# Supplementary material for: Transport of organic anions and cations in murine embryonic kidney development and in serially-reaggregated engineered kidneys
Source: PubMed Central journal article supplement (PMC4357899; doi:10.1038/srep09092), 2015-03-13
Supplement: srep09092-s1.pdf [file srep09092-s1.pdf]

# Transport of organic anions and cations in murine embryonic kidney development and in serially-reaggregated engineered kidneys

Melanie L Lawrence, C-Hong Chang, Jamie A Davies\*  
Centre for Integrative Physiology, The University of Edinburgh

## Supplementary Figure S1

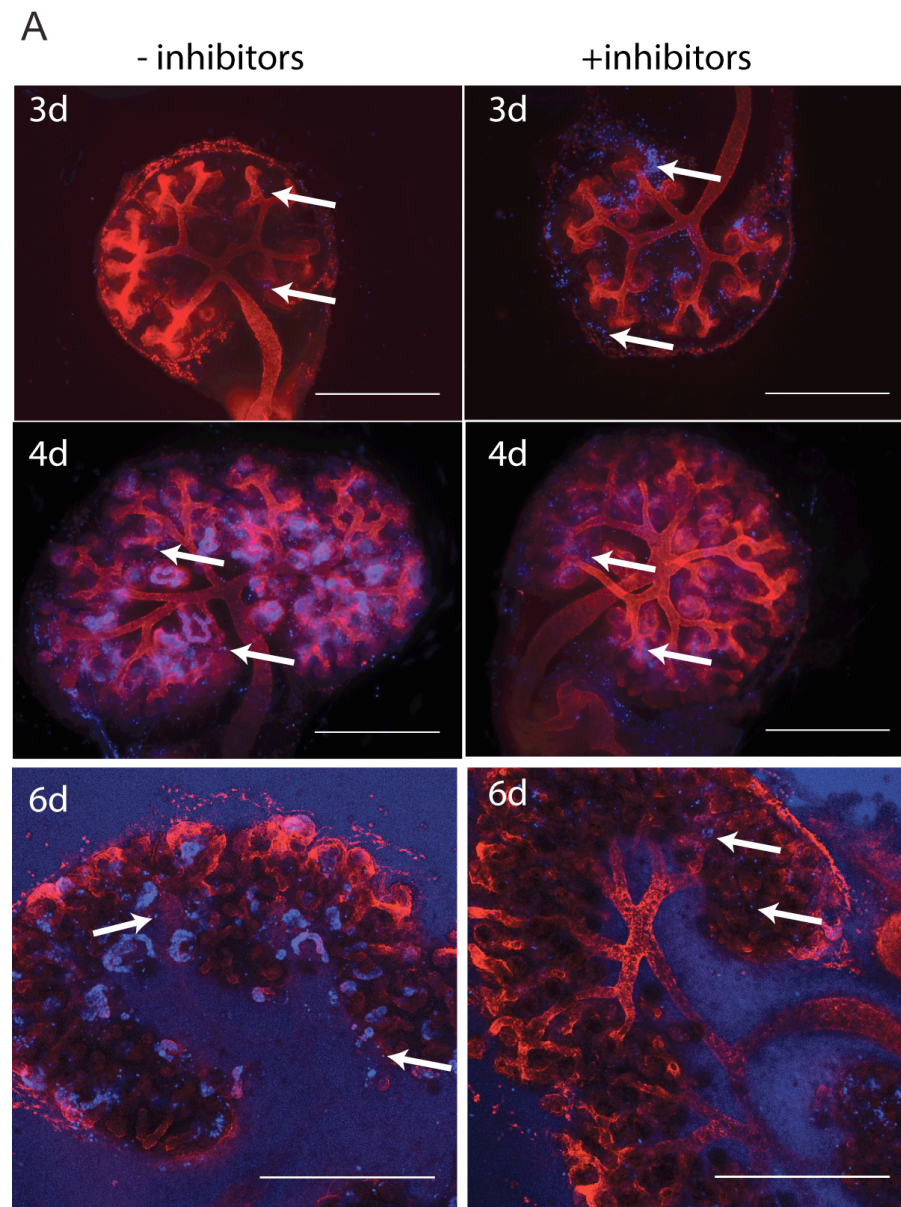

Figure S1. *DAPI-positive nuclei outside tubules in cultured embryonic kidneys*

(A) White arrows point to examples of DAPI-positive cells (blue) that are not inside tubules in live cultured kidneys, at 3 days, 4 days and 6 days in culture and both with and without inhibitor treatment. Scale bars represent 300um.

## Supplementary Table S1

### Primers for RT-PCR

|                                       |
|---------------------------------------|
| <b>Oat1</b>                           |
| Forward primer: ATGGTGGGAGTGTTACTGGG  |
| Reverse primer: GGAGCCGGAAAATGCAGTAG  |
| <b>Oat3</b>                           |
| Forward primer: TACAGTTGTCCGTGTCTGC   |
| Reverse primer: TTCAGCTCCTCCACAGTGAG  |
| <b>Oatp4c1</b>                        |
| Forward primer: TTATGATAGGCCTGGGAGCG  |
| Reverse primer: CCAGCAACAATTGTCCCAGG  |
| <b>Oct1</b>                           |
| Forward primer: GTCCTTCGTTTGCAGACCTG  |
| Reverse primer: TATTGGGTAGATGCGGCCA   |
| <b>Oct2</b>                           |
| Forward primer: TGGGCATTGGTTACCTAGCA  |
| Reverse primer: TTGCTGACCAGTCCCTGTAG  |
| <b>Mrp2</b>                           |
| Forward primer: ACACCAACCAGAAATGCGTC  |
| Reverse primer: GGACAGAACAAAGCCCACAG  |
| <b><math>\beta</math> -actin</b>      |
| Forward primer: CTGGGACGACATGGAGGARA* |
| Reverse primer: AAGGAAGGCTGGAARAGWGC* |

- R=50:50 A+G, W=50:50 A+T
